# Supplementary material
Source: MDPI journal article supplement (https://www.mdpi.com/1424-2818/15/12/1163)
Supplement: s1 [file s1]

# Trophic partitioning among three mesopredatory shark species inhabiting the north-western Adriatic Sea

Licia Finotto, Daniela Berto, Federico Rampazzo, Saša Raicevich, Sara Bonanomi, Carlotta Mazzoldi

Figure S1 Length-frequency distributions of females (red bars) and males (blue bars) of (a) *Scyliorhinus canicula*, (b) *Mustelus mustelus*, and (c) *M. punctulatus* used for stomach content analysis (non-empty stomachs).

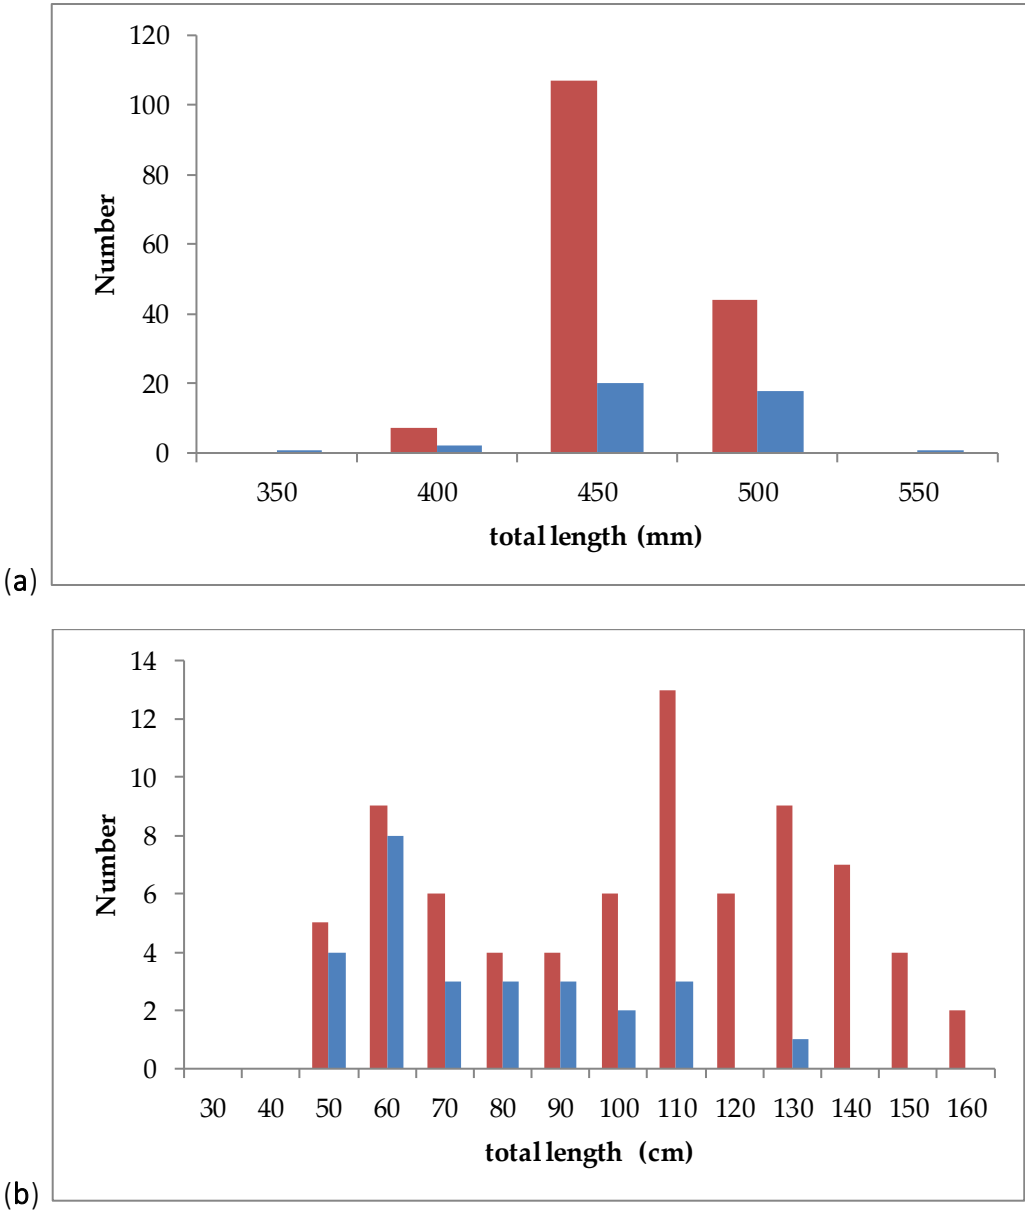

(c)

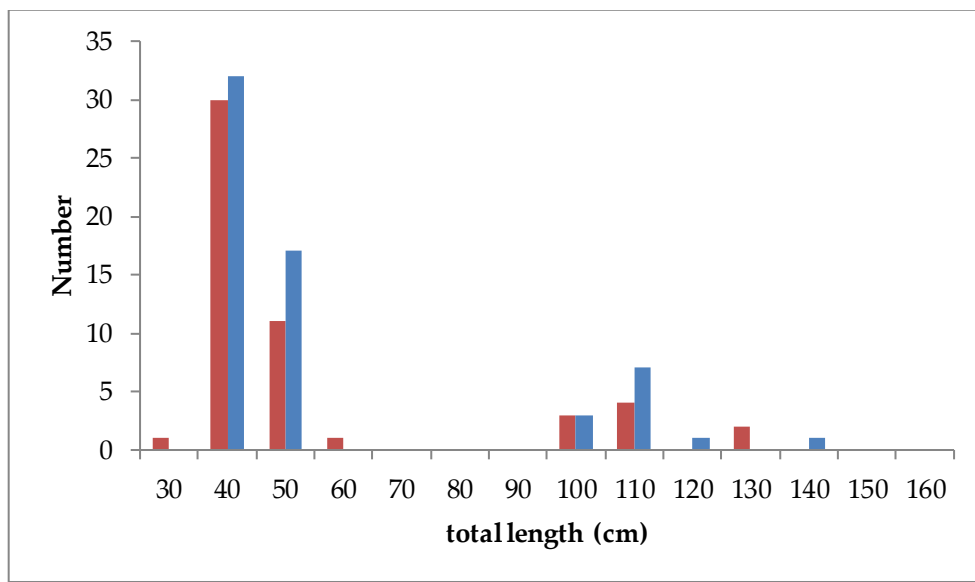

Table S1: List of all the prey categories identified in the diet of *S. canicula*, *M. mustelus*, and *M. punctulatus*, with the respective values of percent frequency of occurrence (%FOi), prey-specific abundance (%PNi), prey-specific weight (%PWi), and prey-specific index of relative importance (%PSIRIi). To perform multivariate analysis, prey categories were aggregated on the base of taxonomic criteria and %FOi<5%.

| Aggregated prey categories           | Prey categories                      | <i>Scyliorhinus canicula</i> |      |      |             | <i>Mustelus mustelus</i> |     |      |            | <i>Mustelus punctulatus</i> |     |      |            |
|--------------------------------------|--------------------------------------|------------------------------|------|------|-------------|--------------------------|-----|------|------------|-----------------------------|-----|------|------------|
|                                      |                                      | %FO                          | %PN  | %PW  | %PSIRI      | %FO                      | %PN | %PW  | %PSIRI     | %FO                         | %PN | %PW  | %PSIRI     |
|                                      | <b>Total TELEOSTS</b>                |                              |      |      | <b>25.3</b> |                          |     |      | <b>3.5</b> |                             |     |      | <b>9.0</b> |
| Unid. Teleost                        | unidentified                         | 47.5                         | 27.7 | 23.7 | 12.2        | 22.5                     | 0.2 | 16.6 | 2.6        | 29.2                        | 0.2 | 16.7 | 5.1        |
| Bento-demersal fishes                | unid. Triglidae                      | 1.0                          | 25.0 | 30.9 | 0.3         |                          |     |      |            |                             |     |      |            |
|                                      | <i>Lepidotrigla cavillone</i>        | 0.5                          | 14.3 | 23.0 | 0.1         |                          |     |      |            |                             |     |      |            |
|                                      | <i>Callionymus</i> sp.               | 0.5                          | 8.7  | 5.1  | 0.0         |                          |     |      |            |                             |     |      |            |
|                                      | <i>Callionymus maculatus</i>         | 0.5                          | 12.5 | 39.3 | 0.1         |                          |     |      |            |                             |     |      |            |
|                                      | <i>Callionymus risso</i>             | 0.5                          | 12.5 | 19.5 | 0.1         |                          |     |      |            |                             |     |      |            |
|                                      | <i>Serranus hepatus</i>              | 3.0                          | 16.5 | 25.1 | 0.6         |                          |     |      |            |                             |     |      |            |
| Flatfishes                           | unid. flatfishes                     | 1.5                          | 26.1 | 31.4 | 0.4         | 2.0                      | 0.3 | 27.8 | 0.5        |                             |     |      |            |
|                                      | unid. Pleuronectidae                 | 0.5                          | 14.3 | 53.9 | 0.2         |                          |     |      |            |                             |     |      |            |
|                                      | <i>Solea monochir</i>                | 1.5                          | 28.1 | 62.3 | 0.7         |                          |     |      |            |                             |     |      |            |
|                                      | <i>Arnoglossus</i> sp.               | 6.0                          | 23.4 | 35.3 | 1.8         |                          |     |      |            |                             |     |      |            |
|                                      | <i>Arnoglossus imperialis</i>        | 1.0                          | 19.6 | 20.9 | 0.2         |                          |     |      |            |                             |     |      |            |
|                                      | <i>Arnoglossus laterna</i>           | 3.5                          | 17.5 | 30.3 | 0.8         |                          |     |      |            |                             |     |      |            |
| <i>Deltentosteus quadrimaculatus</i> | <i>Deltentosteus quadrimaculatus</i> | 12.0                         | 25.0 | 30.8 | 3.3         |                          |     |      |            |                             |     |      |            |
| <i>Cepola macrophthalma</i>          | <i>Cepola macrophthalma</i>          | 9.0                          | 29.8 | 41.6 | 3.2         |                          |     |      |            |                             |     |      |            |

|                         |                                |      |      |      |      |      |     |      |      |      |     |      |      |
|-------------------------|--------------------------------|------|------|------|------|------|-----|------|------|------|-----|------|------|
| Pelagic fishes          | <i>Sardina pilchardus</i>      |      |      |      |      |      |     |      |      | 2.7  | 0.1 | 13.1 | 0.7  |
|                         | <i>Engraulis encrasicolus</i>  | 3.5  | 26.5 | 43.4 | 1.2  | 2.9  | 0.2 | 15.1 | 0.5  | 8.8  | 0.3 | 27.9 | 3.1  |
| Total CRUSTACEANS       |                                |      |      |      | 59.6 |      |     |      | 95.3 |      |     |      | 66.2 |
| Unid. Crustacean        | unidentified                   | 31.0 | 32.8 | 21.1 | 8.4  | 25.5 | 0.3 | 25.9 | 4.9  | 35.4 | 0.3 | 30.5 | 10.9 |
| Unid. Decapoda          | unid. Decapoda                 | 0.5  | 16.7 | 0.0  | 0.0  | 1.0  | 0.9 | 90.9 | 0.9  |      |     |      |      |
|                         | unid. Stenopodidea             | 0.5  | 44.4 | 20.4 | 0.2  |      |     |      |      |      |     |      |      |
| Other Pleocyemata       | <i>Upogebia tipica</i>         |      |      |      |      |      |     |      |      | 2.7  | 0.3 | 29.2 | 0.6  |
|                         | unid. Reptantia                | 2.0  | 9.2  | 27.0 | 0.4  | 1.0  | 0.1 | 6.3  | 0.0  | 4.4  | 0.2 | 21.1 | 1.4  |
|                         | unid. Anomura                  | 1.5  | 14.5 | 14.0 | 0.2  | 2.0  | 0.1 | 10.1 | 0.2  | 0.9  | 0.1 | 11.1 | 0.1  |
| Anomura                 | <i>Dardanus</i> sp.            |      |      |      |      | 3.9  | 0.2 | 21.3 | 0.7  | 22.1 | 0.3 | 34.4 | 8.3  |
|                         | <i>Dardanus calidus</i>        |      |      |      |      | 2.0  | 0.1 | 11.8 | 0.2  | 13.3 | 0.3 | 28.0 | 4.1  |
|                         | unid. Brachiura                | 18.0 | 25.9 | 37.9 | 5.7  | 20.6 | 0.3 | 31.9 | 6.5  | 16.8 | 0.2 | 18.1 | 4.0  |
|                         | unid. Macropodia               | 0.5  | 20.0 | 1.7  | 0.1  |      |     |      |      |      |     |      |      |
| Other Brachiura         | <i>Pilumnus hirtellus</i>      |      |      |      |      | 1.0  | 0.1 | 6.7  | 0.2  |      |     |      |      |
|                         | <i>Pilumnus villosissimus</i>  |      |      |      |      | 1.0  | 0.1 | 11.1 | 0.2  |      |     |      |      |
|                         | unid. Parthenopidae            |      |      |      |      | 2.0  | 0.1 | 13.9 | 0.3  | 1.8  | 0.1 | 13.9 | 0.3  |
|                         | <i>Derilambrus angulifrons</i> |      |      |      |      |      |     |      |      | 0.9  | 0.1 | 6.7  | 0.1  |
|                         | <i>Corystes cassivelaunus</i>  |      |      |      |      |      |     |      |      | 0.9  | 0.1 | 13.3 | 0.1  |
| <i>Ethusa mascarone</i> | <i>Ethusa mascarone</i>        | 0.5  | 9.1  | 5.1  | 0.0  | 26.5 | 0.3 | 27.4 | 7.2  | 12.4 | 0.2 | 22.3 | 2.9  |
|                         | unid. Portunidae               | 16.5 | 29.2 | 49.3 | 6.5  | 28.4 | 0.4 | 38.4 | 10.2 | 5.3  | 0.3 | 29.9 | 1.8  |
| Portunidae              | <i>Liocarcinus</i> sp.         | 13.0 | 35.5 | 44.6 | 5.2  | 17.6 | 0.4 | 36.8 | 6.5  | 6.2  | 0.3 | 28.9 | 2.0  |
|                         | <i>Liocarcinus depurator</i>   | 21.0 | 36.9 | 70.3 | 11.3 | 35.3 | 0.4 | 43.6 | 16.6 | 6.2  | 0.5 | 49.0 | 3.6  |

|                        |                               |      |      |      |            |      |     |      |            |      |     |      |             |
|------------------------|-------------------------------|------|------|------|------------|------|-----|------|------------|------|-----|------|-------------|
|                        | <i>Liocarcinus vernalis</i>   | 0.5  | 25.0 | 22.6 | 0.1        | 18.6 | 0.2 | 17.7 | 3.9        |      |     |      |             |
|                        | <i>Carcinus aestuarii</i>     |      |      |      |            | 12.7 | 0.3 | 33.1 | 5.0        |      |     |      |             |
| Unid. Caridea          | unid. Caridea                 | 30.0 | 37.5 | 19.5 | 8.6        | 9.8  | 0.3 | 29.3 | 2.6        | 17.7 | 0.3 | 25.0 | 5.5         |
|                        | <i>Alpheus glaber</i>         | 10.5 | 23.1 | 23.5 | 2.4        |      |     |      |            | 0.9  | 0.1 | 14.3 | 0.2         |
| Other Dendrobranchiata | unid. Solenoceridae           | 0.5  | 16.7 | 21.8 | 0.1        |      |     |      |            |      |     |      |             |
|                        | unid. Penaeidae               | 0.5  | 14.3 | 3.7  | 0.0        | 2.0  | 0.1 | 12.1 | 0.4        |      |     |      |             |
|                        | <i>Penaeus kerathurus</i>     |      |      |      |            | 8.8  | 0.2 | 17.7 | 1.6        |      |     |      |             |
| Processidae            | unid. Processidae             | 13.0 | 26.9 | 12.3 | 2.6        | 16.7 | 0.3 | 32.9 | 3.0        | 42.5 | 0.6 | 56.0 | 17.8        |
|                        | <i>Processa edulis</i>        | 3.0  | 44.6 | 27.2 | 1.1        |      |     |      |            |      |     |      |             |
|                        | unid. Stomatopoda             | 2.5  | 22.2 | 25.4 | 0.6        | 15.7 | 0.2 | 16.0 | 2.7        |      |     |      |             |
| Other Stomatopoda      | <i>Lysisquilla</i> sp.        | 2.0  | 10.6 | 6.5  | 0.2        |      |     |      |            |      |     |      |             |
|                        | <i>Platysquilla eusebia</i>   | 1.0  | 13.4 | 2.6  | 0.1        |      |     |      |            |      |     |      |             |
|                        | <i>Squilla mantis</i>         | 1.5  | 48.1 | 36.3 | 0.6        | 47.1 | 0.3 | 34.2 | 20.9       | 7.1  | 0.3 | 29.6 | 2.4         |
|                        | <i>Rissoides desmaresti</i>   | 15.0 | 31.0 | 30.3 | 4.6        | 4.9  | 0.2 | 16.9 | 0.6        | 0.9  | 0.2 | 16.7 | 0.2         |
| Isopoda                | unid. Isopoda                 | 3.5  | 19.1 | 1.9  | 0.4        | 2.0  | 0.2 | 15.5 | 0.2        | 0.9  | 0.3 | 25.0 | 0.2         |
|                        | <i>Sphaeroma serratum</i>     | 1.5  | 22.2 | 30.0 | 0.4        |      |     |      |            |      |     |      |             |
|                        | <b>Total POLYCHAETES</b>      |      |      |      | <b>4.7</b> |      |     |      | <b>0.6</b> |      |     |      | <b>14.1</b> |
|                        | unid. Polychaete              | 27.0 | 22.4 | 11.6 | 4.6        | 5.9  | 0.2 | 17.2 | 0.6        | 60.2 | 0.2 | 22.4 | 12.3        |
| Polychaete             | <i>Polygordius triestinus</i> | 0.5  | 16.7 | 14.8 | 0.1        |      |     |      |            |      |     |      |             |
|                        | <i>Arenicola marina</i>       |      |      |      |            |      |     |      |            | 10.6 | 0.1 | 14.2 | 1.8         |
|                        | <b>Total MOLLUSCS</b>         |      |      |      | <b>9.7</b> |      |     |      | <b>0.5</b> |      |     |      | <b>9.0</b>  |
| Unid. Cephalopods      | unidentified                  | 9.5  | 20.9 | 18.0 | 1.8        |      |     |      |            | 19.5 | 0.2 | 20.3 | 4.2         |

|                     |                             |      |      |      |     |     |     |      |     |  |      |     |      |     |
|---------------------|-----------------------------|------|------|------|-----|-----|-----|------|-----|--|------|-----|------|-----|
| <i>Eledone</i> spp. | <i>Eledone</i> sp.          | 0.5  | 33.3 | 18.5 | 0.1 |     |     |      |     |  | 2.7  | 0.1 | 13.8 | 0.4 |
|                     | unid. Sepiidae              | 3.5  | 22.0 | 21.9 | 0.8 |     |     |      |     |  |      |     |      |     |
| Sepiidae            | <i>Sepia officinalis</i>    | 1.5  | 17.6 | 58.8 | 0.6 |     |     |      |     |  |      |     |      |     |
|                     | <i>Sepia elegans</i>        | 1.0  | 23.8 | 71.9 | 0.5 |     |     |      |     |  |      |     |      |     |
|                     | unid. Sepiolidae            | 19.0 | 25.7 | 15.2 | 3.9 |     |     |      |     |  | 14.2 | 0.2 | 23.8 | 3.8 |
| Sepiolidae          | <i>Sepietta oweniana</i>    | 3.0  | 17.4 | 26.6 | 0.7 |     |     |      |     |  |      |     |      |     |
|                     | <i>Sepiola rondeleti</i>    | 1.0  | 9.5  | 22.3 | 0.2 |     |     |      |     |  |      |     |      |     |
|                     | unid. Teuthida              | 2.5  | 24.2 | 22.0 | 0.6 | 1.0 | 0.1 | 14.3 | 0.1 |  | 0.9  | 0.1 | 10.0 | 0.3 |
| Teuthida            | <i>Alloteuthis media</i>    | 1.0  | 16.7 | 39.5 | 0.3 |     |     |      |     |  |      |     |      |     |
|                     | <i>Alloteuthis subulata</i> | 0.5  | 20.0 | 33.6 | 0.1 |     |     |      |     |  |      |     |      |     |
|                     | unid. Bivalvia              | 1.0  | 25.0 | 1.0  | 0.1 | 2.9 | 0.1 | 7.5  | 0.1 |  | 2.7  | 0.1 | 11.6 | 0.2 |
| Bivalvia            | Mussels                     |      |      |      |     | 2.9 | 0.2 | 18.1 | 0.3 |  |      |     |      |     |
|                     | <i>Tapes</i> sp.            |      |      |      |     | 2.0 | 0.0 | 4.2  | 0.1 |  |      |     |      |     |
|                     | unid. Solenoidae            |      |      |      |     |     |     |      |     |  | 0.9  | 0.2 | 16.7 | 0.1 |
|                     | unid. Veneridae             | 0.5  | 25.0 | 0.0  | 0.1 |     |     |      |     |  |      |     |      |     |
|                     | unid. Sipunculidae          | 1.5  | 15.1 | 1.2  | 0.1 |     |     |      |     |  |      |     |      |     |
| Other               | <i>Sipunculus nudus</i>     |      |      |      |     |     |     |      |     |  | 5.3  | 0.3 | 27.1 | 1.5 |
|                     | unid. Holothuroidea         | 2.5  | 22.5 | 19.2 | 0.5 |     |     |      |     |  |      |     |      |     |
|                     | unid. Nemertea              | 0.5  | 25.0 | 4.7  | 0.1 |     |     |      |     |  |      |     |      |     |
|                     | <i>Suberites domuncula</i>  |      |      |      |     |     |     |      |     |  | 0.9  | 0.1 | 14.3 | 0.1 |

Table S2: Results of the similarity percentage (SIMPER) analysis reporting the average biomass and percentage contribution of the different prey categories to the difference observed between the combination of sex\*size comparisons in the diet of *M. mustelus*. Only prey categories contributing at least with 4% to the difference were included in the table.

| Average<br>dissimilarity (%) | Prey category           | Average biomass | Average biomass | Contribution (%) |
|------------------------------|-------------------------|-----------------|-----------------|------------------|
|                              |                         | Small Females   | Small Males     |                  |
| 75.80                        | <i>Squilla mantis</i>   | 1.95            | 0.67            | 24.48            |
|                              | Portunidae              | 1.36            | 1.44            | 20.50            |
|                              | <i>Ethusa mascarone</i> | 0.84            | 0.87            | 13.07            |
|                              | other Brachiura         | 0.28            | 0.56            | 8.91             |
|                              | unid. crustacea         | 0.42            | 0.34            | 7.02             |
|                              | other Stomatopoda       | 0.22            | 0.22            | 4.33             |
|                              |                         | Small Females   | Big Females     |                  |
| 75.92                        | Portunidae              | 1.36            | 6.13            | 41.07            |
|                              | <i>Squilla mantis</i>   | 1.95            | 2.50            | 21.04            |
|                              | other Brachiura         | 0.28            | 0.69            | 6.56             |
|                              | <i>Ethusa mascarone</i> | 0.84            | 0.00            | 6.53             |
|                              | unid. crustacea         | 0.42            | 0.28            | 4.36             |
|                              | other Stomatopoda       | 0.22            | 0.39            | 4.29             |
|                              |                         | Small Males     | Big Females     |                  |
| 79.88                        | Portunidae              | 1.44            | 6.13            | 41.42            |
|                              | <i>Squilla mantis</i>   | 0.67            | 2.50            | 19.79            |
|                              | other Brachiura         | 0.56            | 0.69            | 8.42             |
|                              | <i>Ethusa mascarone</i> | 0.87            | 0.00            | 6.69             |
|                              | other Stomatopoda       | 0.22            | 0.39            | 4.42             |
|                              | unid. crustacea         | 0.34            | 0.28            | 4.33             |
|                              |                         | Small Females   | Big Males       |                  |
| 73.55                        | <i>Squilla mantis</i>   | 1.95            | 3.33            | 27.29            |
|                              | Portunidae              | 1.36            | 3.51            | 25.82            |
|                              | other Dendrobranchiata  | 0.00            | 1.53            | 9.24             |
|                              | other Brachiura         | 0.28            | 0.70            | 7.43             |
|                              | <i>Ethusa mascarone</i> | 0.84            | 0.00            | 7.41             |

|       |                           |                    |                  |       |
|-------|---------------------------|--------------------|------------------|-------|
|       | unid. teleosts            | 0.24               | 0.59             | 5.91  |
|       |                           | <b>Small Males</b> | <b>Big Males</b> |       |
| 82.64 | <i>Squilla mantis</i>     | 0.67               | 3.33             | 30.59 |
|       | Portunidae                | 1.44               | 3.51             | 24.08 |
|       | other Brachiura           | 0.56               | 0.70             | 9.24  |
|       | other Dendrobranchiata    | 0.00               | 1.53             | 8.70  |
|       | <i>Ethusa mascarone</i>   | 0.87               | 0.00             | 7.15  |
|       | unid. teleosts            | 0.11               | 0.59             | 4.94  |
|       |                           | <b>Big Females</b> | <b>Big Males</b> |       |
| 63.91 | Portunidae                | 6.13               | 3.51             | 38.06 |
|       | <i>Squilla mantis</i>     | 2.50               | 3.33             | 25.05 |
|       | other Brachiura           | 0.69               | 0.70             | 8.96  |
|       | other Dendrobranchiata    | 0.00               | 1.53             | 8.72  |
|       | unid. teleosts            | 0.33               | 0.59             | 5.11  |
|       | <i>Penaeus kerathurus</i> | 0.35               | 0.48             | 4.43  |



Table S3. Carbon ( $\delta^{13}\text{C}$ ) and nitrogen ( $\delta^{15}\text{N}$ ) stable isotopes ratios (mean  $\pm$  std.dev.) and estimated trophic level of *S. canicula*, *M. mustelus*, and *M. punctulatus*. Data are presented divided for sex and size.

| Species               |              | Females                   |                           |               | Males                     |                           |               |
|-----------------------|--------------|---------------------------|---------------------------|---------------|---------------------------|---------------------------|---------------|
|                       |              | $\delta^{13}\text{C}$ (‰) | $\delta^{15}\text{N}$ (‰) | trophic level | $\delta^{13}\text{C}$ (‰) | $\delta^{15}\text{N}$ (‰) | trophic level |
| <i>M. mustelus</i>    | <b>small</b> | -17.24 $\pm$ 0.67         | 13.04 $\pm$ 0.19          | 4.1           | -17.37 $\pm$ 1.64         | 13.50 $\pm$ 0.35          | 4.1           |
|                       | <b>big</b>   | -13.31 $\pm$ 1.75         | 13.97 $\pm$ 0.78          | 4.0           | -13.95 $\pm$ 1.74         | 13.23 $\pm$ 0.38          | 4.0           |
| <i>M. punctulatus</i> | <b>small</b> | -16.69 $\pm$ 2.16         | 12.59 $\pm$ 0.60          | 3.7           | -17.60 $\pm$ 1.74         | 12.09 $\pm$ 1.40          | 3.7           |
|                       | <b>big</b>   | -15.12 $\pm$ 1.87         | 13.45 $\pm$ 1.09          | 4.2           | -13.55 $\pm$ 2.80         | 13.58 $\pm$ 0.78          | 4.2           |
| <i>S. canicula</i>    | <b>big</b>   | -17.99 $\pm$ 0.75         | 13.58 $\pm$ 0.34          | 4.2           | -17.71 $\pm$ 1.12         | 13.45 $\pm$ 0.62          | 4.1           |

Table S4. Carbon ( $\delta^{13}\text{C}$ ) and nitrogen ( $\delta^{15}\text{N}$ ) stable isotopes ratios (mean  $\pm$  std.dev.) and estimated trophic value of the main prey items of the three studied shark species.

| Taxon      | Prey                                 | $\delta^{13}\text{C}$ (‰) | $\delta^{15}\text{N}$ (‰) | trophic level |
|------------|--------------------------------------|---------------------------|---------------------------|---------------|
| Fish       | <i>Serranus hepatus</i>              | -17.84 $\pm$ 0.05         | 12.05 $\pm$ 0.59          | 3.7           |
|            | <i>Arnoglossus laterna</i>           | -17.96 $\pm$ 0.67         | 11.45 $\pm$ 0.37          | 3.5           |
|            | <i>Monochirus hispidus</i>           | -18.34 $\pm$ 0.37         | 11.18 $\pm$ 0.53          | 3.4           |
|            | <i>Deltentosteus quadrimaculatus</i> | -16.51 $\pm$ 1.45         | 11.75 $\pm$ 0.91          | 3.6           |
|            | <i>Pomatoschistus minutus</i>        | -17.15 $\pm$ 0.95         | 12.81 $\pm$ 0.16          | 3.9           |
| Crustacean | <i>Liocarcinus depurator</i>         | -16.00 $\pm$ 0.36         | 10.77 $\pm$ 0.63          | 3.3           |
|            | Processidae                          | -15.76 $\pm$ 0.32         | 11.25 $\pm$ 0.73          | 3.5           |
|            | <i>Squilla mantis</i>                | -17.40 $\pm$ 0.63         | 10.90 $\pm$ 0.60          | 3.4           |
| Molluscs   | <i>Aequipecten opercularis</i>       | -19.20 $\pm$ 1.56         | 5.09 $\pm$ 0.45           | 1.7           |

## Analysis of the diets of *Mustelus mustelus* and *M. punctulatus* including only animals attributed to the small size group.

PERMANOVA analysis highlighted a significant difference in the diet between the two species (Figure S2 and Table S5). The average diet similarity was 25.0% within *M. mustelus* and 22.5% within *M. punctulatus*. The average dissimilarity was 90.7% (Table S6).

Table S5. Results of permutational multivariate analysis of variance (PERMANOVA) on the dietary composition by biomass of small sized *M. mustelus* and *M. punctulatus*. Bold values highlight statistical significance.

| PERMANOVA      |     |        |        |          |              |              |
|----------------|-----|--------|--------|----------|--------------|--------------|
| Source         | df  | SS     | MS     | Pseudo-F | P(perm)      | Unique perms |
| <b>Species</b> | 1   | 70548  | 70548  | 22.44    | <b>0.001</b> | 999          |
| Residual       | 139 | 4.37E5 | 3143.9 |          |              |              |
| Total          | 140 | 5.08E5 |        |          |              |              |

Figure S2. Non-metric multidimensional scaling (nMDS) ordination of dietary composition by biomass of *M. mustelus* (Mm, blue ■) and *M. punctulatus* (Mp, green ●).

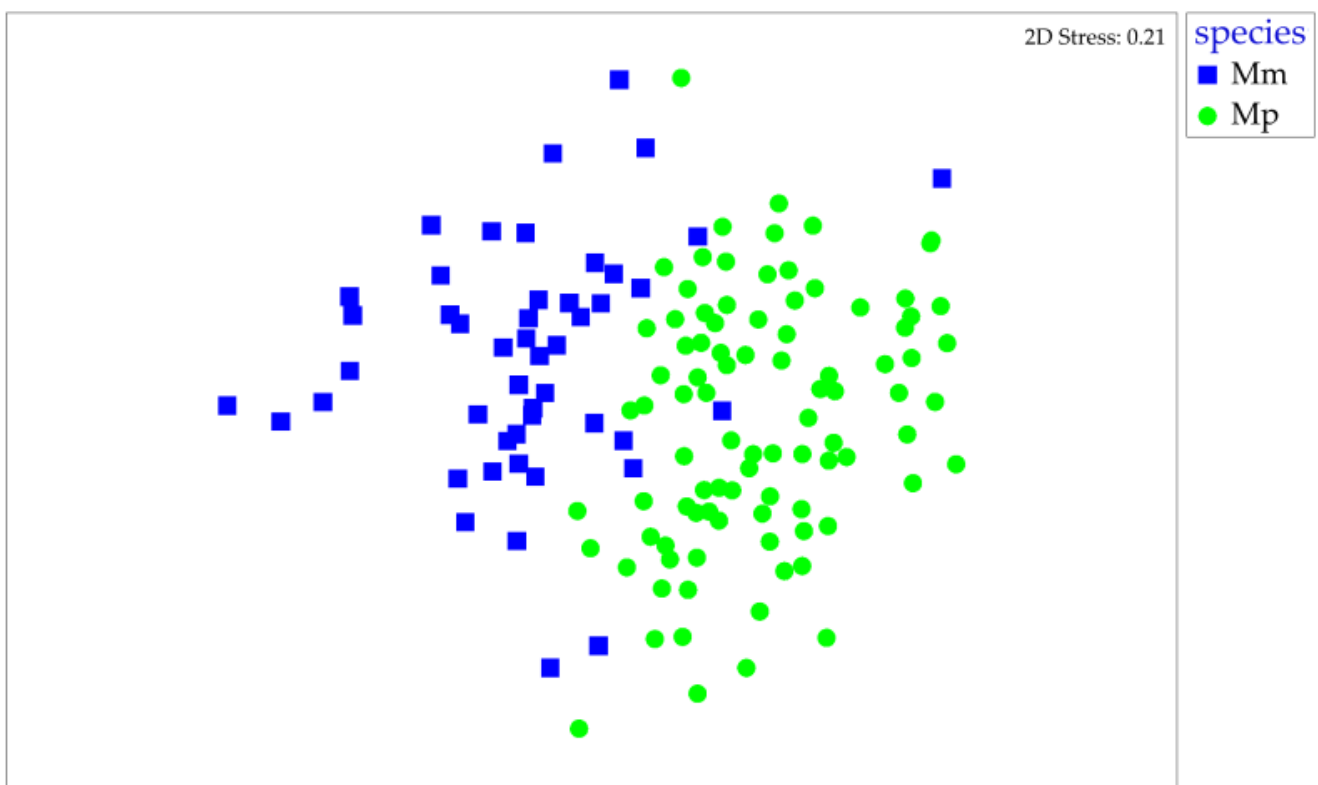

Table S6. Results of the similarity percentage (SIMPER) analysis reporting the average biomass and percentage contribution of the different prey categories to the difference observed in the diet between *M. mustelus* and *M. punctulatus*. Only prey categories contributing at least with 4% to the difference were included in the table

| Prey category           | Average biomass    | Average biomass       | Contribution (%) |
|-------------------------|--------------------|-----------------------|------------------|
|                         | <i>M. mustelus</i> | <i>M. punctulatus</i> |                  |
| Portunidae              | 1.39               | 0.04                  | 18.24            |
| <i>Squilla mantis</i>   | 1.40               | 0.02                  | 17.28            |
| <i>Ethusa mascarone</i> | 0.85               | 0.13                  | 11.42            |
| other Brachiura         | 0.40               | 0.20                  | 7.49             |
| unid. crustacea         | 0.39               | 0.27                  | 6.93             |
| Processidae             | 0.18               | 0.36                  | 5.57             |
| Anomura                 | 0.11               | 0.35                  | 5.55             |
| Polychaete              | 0.06               | 0.40                  | 5.46             |
| other Caridea           | 0.16               | 0.18                  | 4.25             |
